# Supplementary material for: Schistosoma mansoni infection suppresses the growth of Plasmodium yoelii parasites in the liver and reduces gametocyte infectivity to mosquitoes
Source: PubMed Central journal article supplement (PMC5802944; doi:10.1371/journal.pntd.0006197), 2018-01-26

CD4<sup>+</sup> T-bet<sup>+</sup> T cell    CD4<sup>+</sup> GATA-3<sup>+</sup> T cell    NK cell/ NKT cell

$\gamma\delta$ T cell

B6  
Naïve

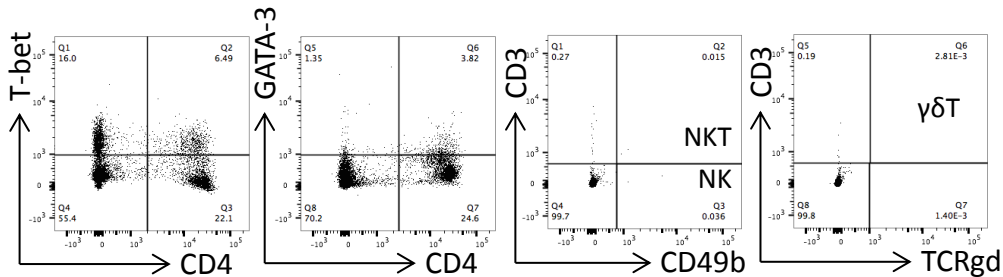

B6  
3,000 frozen eggs  
1 week PI

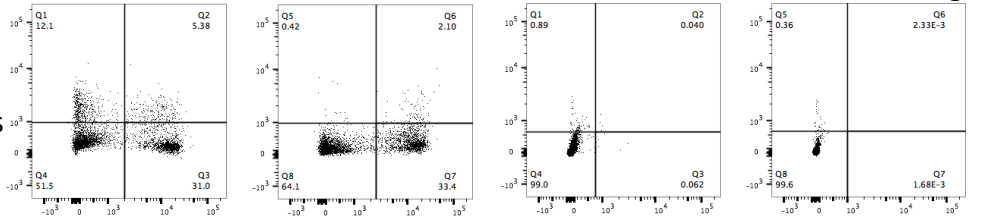

B6  
3,000 frozen eggs  
3 weeks PI

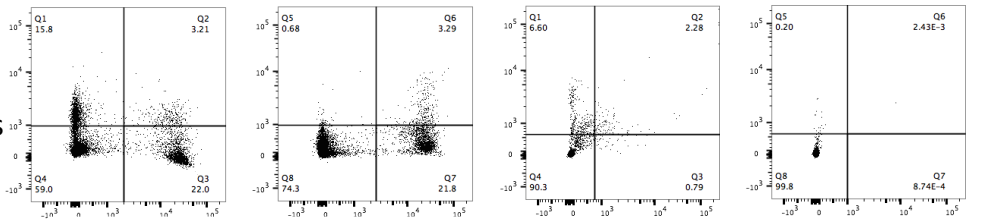

B6  
3,000 frozen eggs  
5 weeks PI

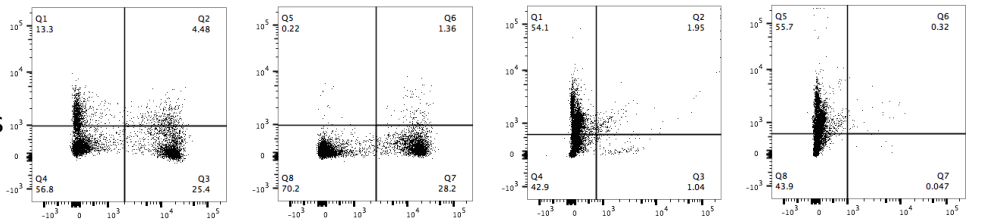

BALB/c  
Naïve

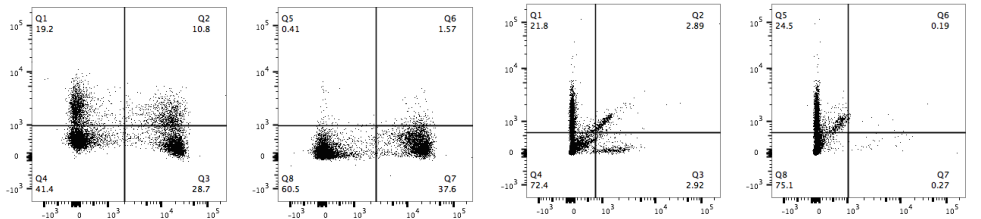

BALB/c  
50 cercariae  
8 weeks PI

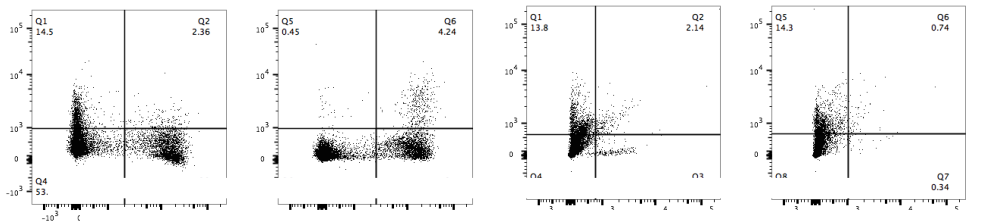

BALB/c  
50 cercariae  
10 weeks PI

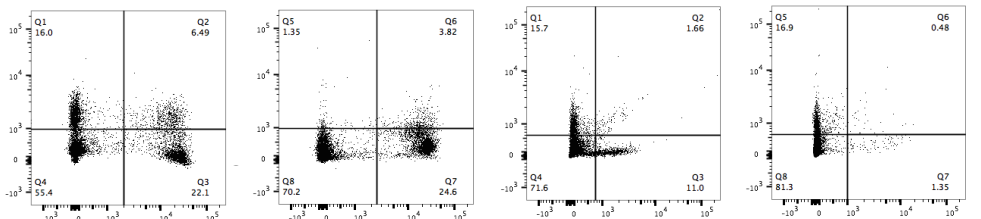

Supplement: pntd.0006197.s001.pdf [file pntd.0006197.s001.pdf]
