# Supplementary material for: Schistosoma mansoni infection suppresses the growth of Plasmodium yoelii parasites in the liver and reduces gametocyte infectivity to mosquitoes
Source: PubMed Central journal article supplement (PMC5802944; doi:10.1371/journal.pntd.0006197), 2018-01-26

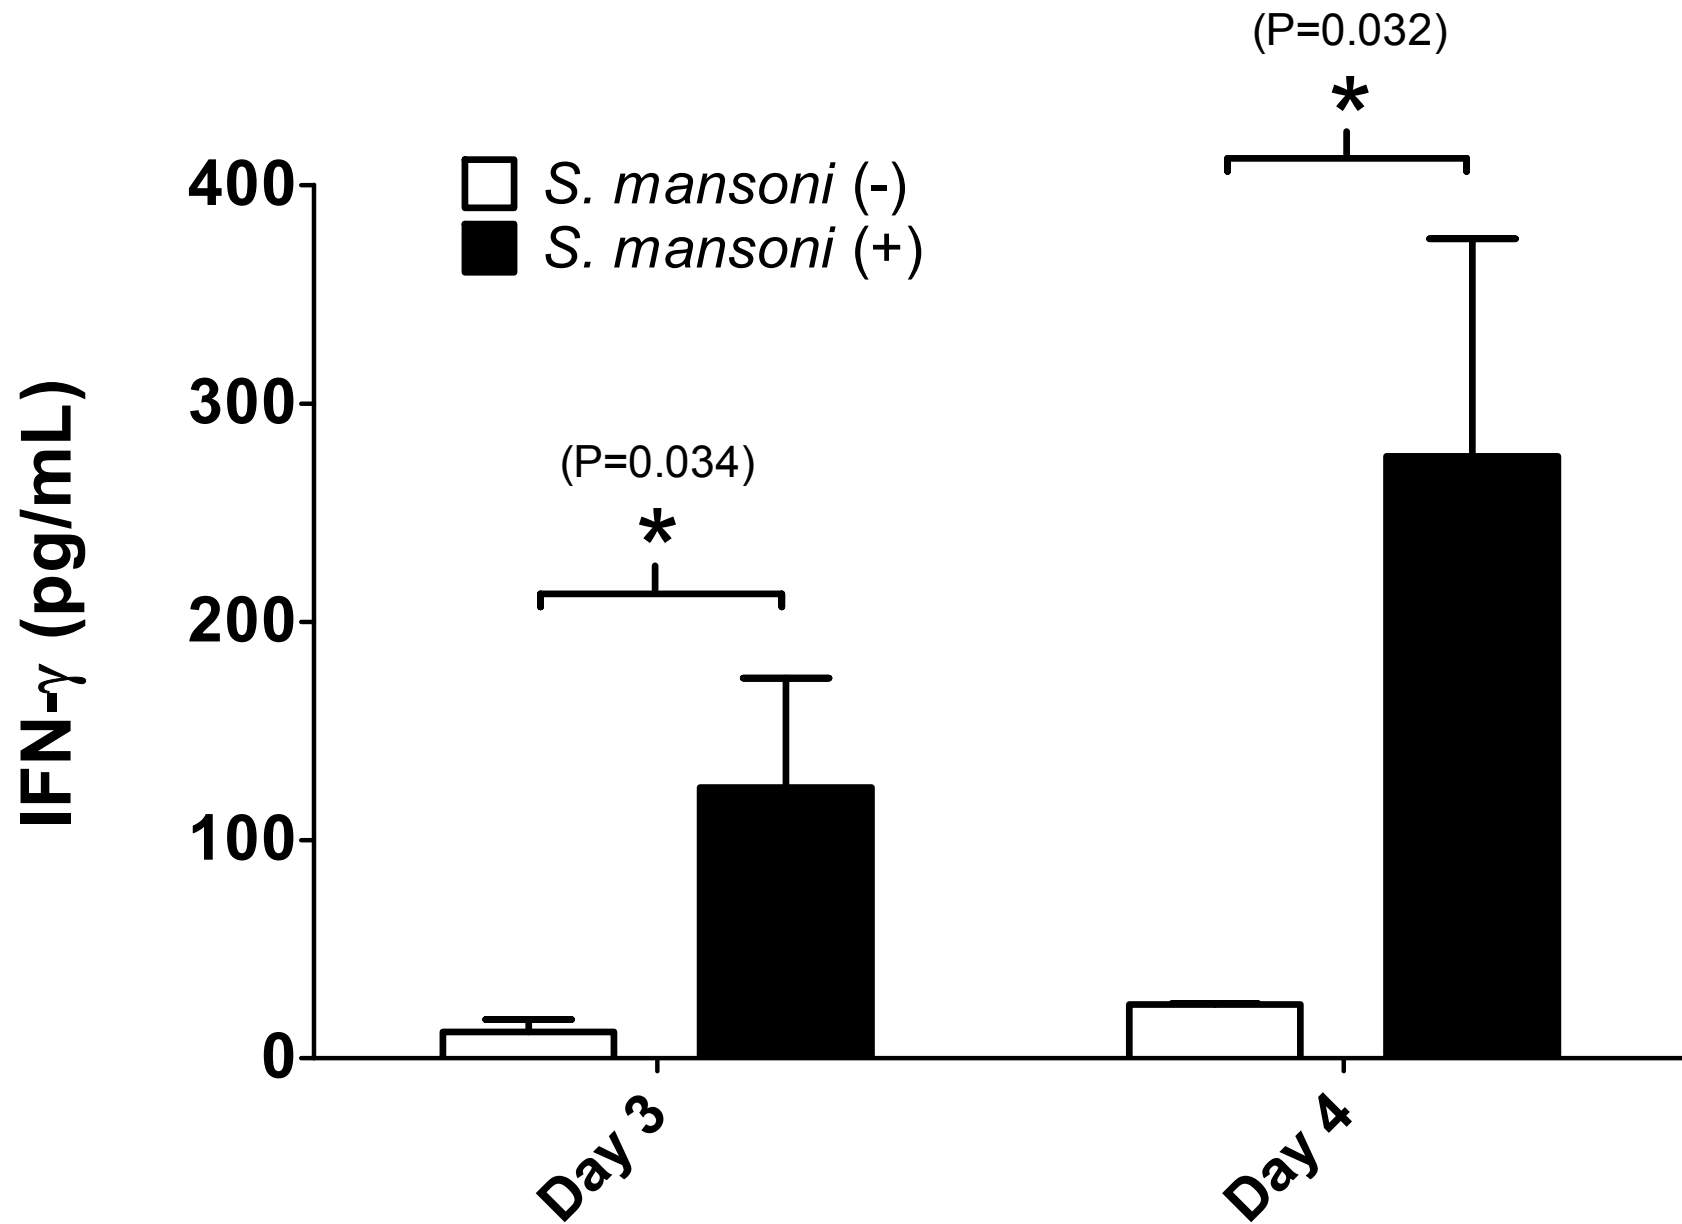

Supplement: pntd.0006197.s003.pdf [file pntd.0006197.s003.pdf]
